# Supplementary material for: Rod-like anhydrous V2O5 assembled by tiny nanosheets as a high-performance cathode material for aqueous zinc-ion batteries
Source: Royal Society of Chemistry journal article supplement (doi:10.1039/c9ra06143f), 2019-01-01
Supplement: c9ra06143f1.pdf [file c9ra06143f1.pdf]

## Electronic Supplementary Information (ESI)

### **Rod-like anhydrous V<sub>2</sub>O<sub>5</sub> assembled by tiny nanosheets as a high-performance cathode material for aqueous zinc-ion batteries**

Weijun Zhou,<sup>a</sup> Jizhang Chen,<sup>\*a</sup> Minfeng Chen,<sup>a</sup> Xinwu Xu,<sup>a</sup> Qinghua Tian,<sup>b</sup> Junling Xu<sup>\*c</sup> and Ching-Ping Wong<sup>c,d</sup>

<sup>a</sup> *College of Materials Science and Engineering, Nanjing Forestry University, Nanjing 210037, China*

<sup>b</sup> *Department of Chemistry, School of Sciences, Zhejiang Sci-Tech University, Hangzhou 310018, China*

<sup>c</sup> *Department of Electronic Engineering, The Chinese University of Hong Kong, NT, Hong Kong, China*

<sup>d</sup> *School of Materials Science and Engineering, Georgia Institute of Technology, Atlanta, United States*

*E-mail addresses:* [jizhang.chen@hotmail.com](mailto:jizhang.chen@hotmail.com) (J. Chen) and [junlingxu@outlook.com](mailto:junlingxu@outlook.com) (J. Xu)

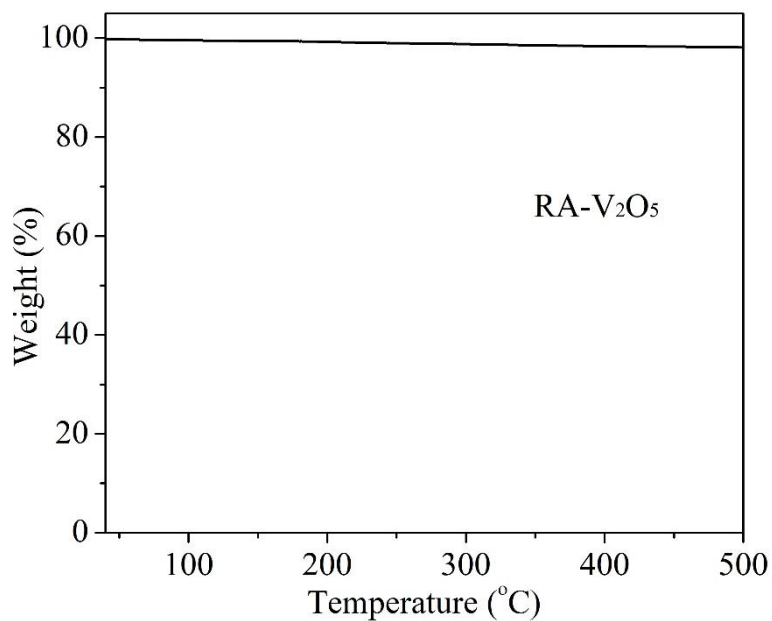

**Fig. S1** TGA curve of RA-V<sub>2</sub>O<sub>5</sub>, measured in air at a heating rate of 10 °C min<sup>-1</sup>.

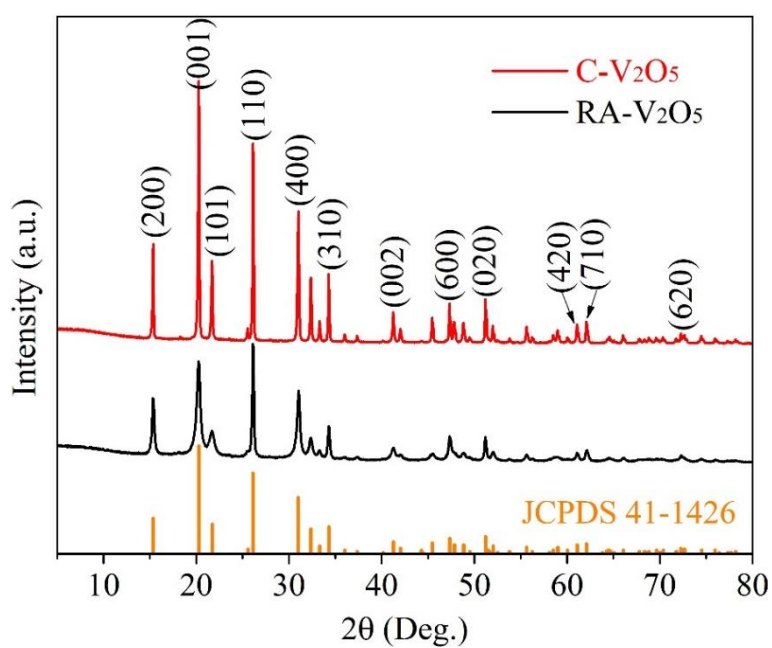

**Fig. S2** XRD pattern of C-V<sub>2</sub>O<sub>5</sub>, in comparison with that of RA-V<sub>2</sub>O<sub>5</sub>.

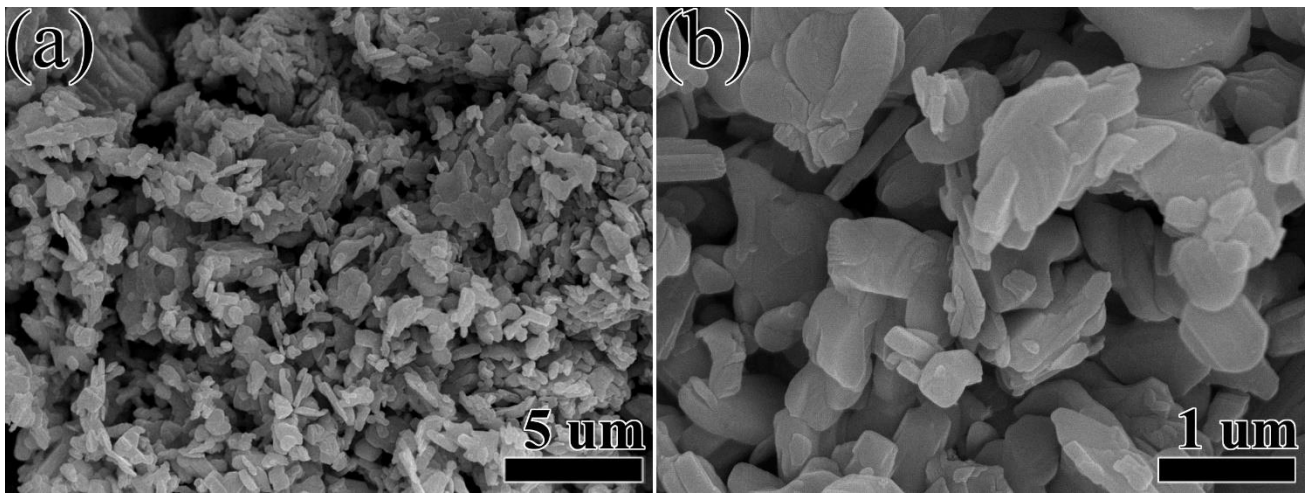

Fig. S3 (a, b) SEM images C-V<sub>2</sub>O<sub>5</sub>.

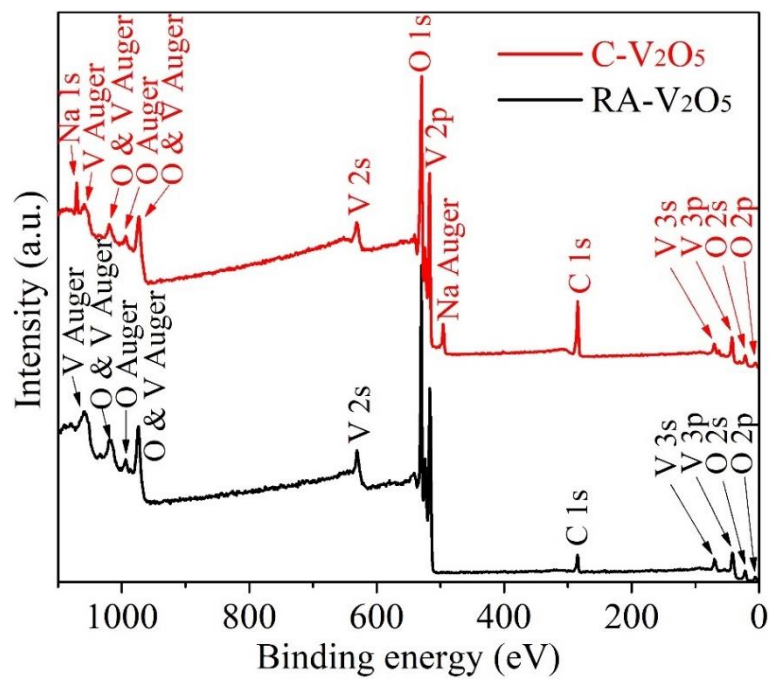

Fig. S4 XPS spectra of RA-V<sub>2</sub>O<sub>5</sub> and C-V<sub>2</sub>O<sub>5</sub>.

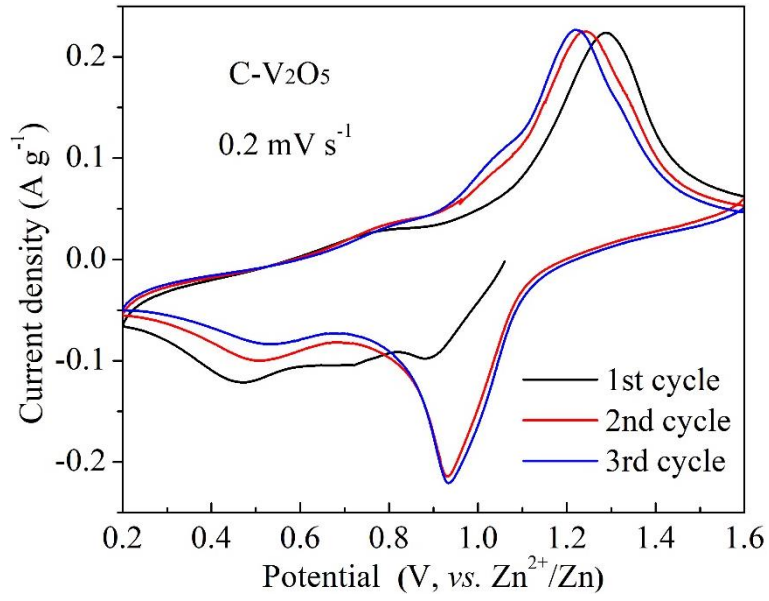

**Fig. S5** CV curves of C-V<sub>2</sub>O<sub>5</sub> in initial three cycles at 0.2 mV s<sup>-1</sup>.

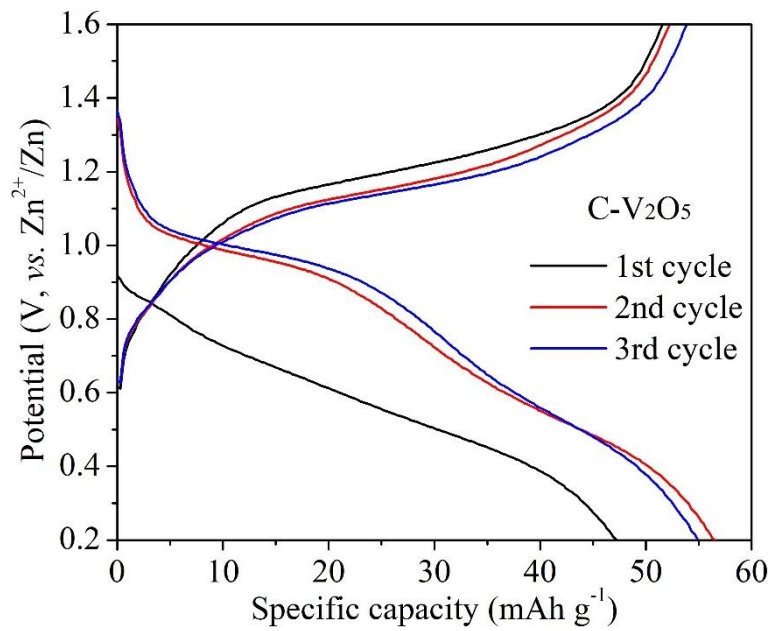

**Fig. S6** GCD curves of C-V<sub>2</sub>O<sub>5</sub> in initial three cycles at 0.1 A g<sup>-1</sup>.

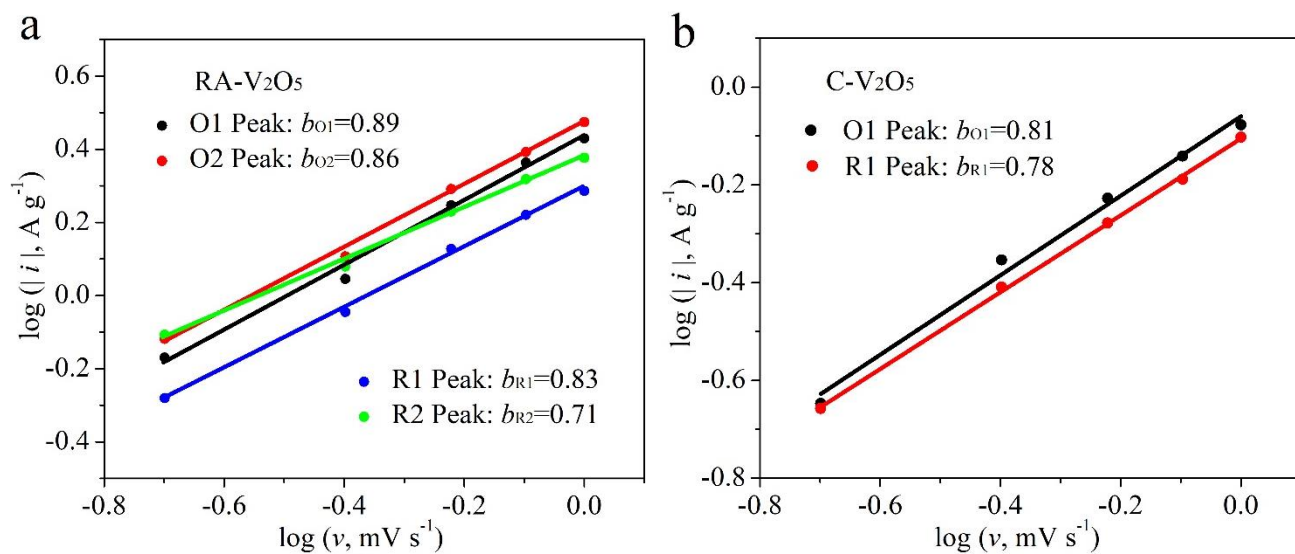

**Fig. S7** Log ( $i$ ) versus log ( $v$ ) plots of different redox peaks of (a) RA-V<sub>2</sub>O<sub>5</sub> and (b) C-V<sub>2</sub>O<sub>5</sub> under CV measurements.

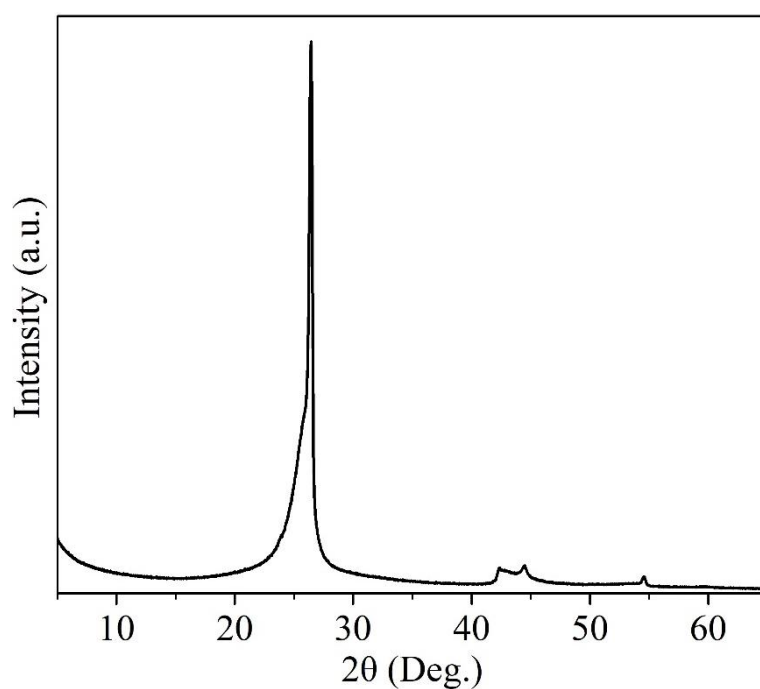

**Fig. S8** XRD pattern of neat CNT powder.

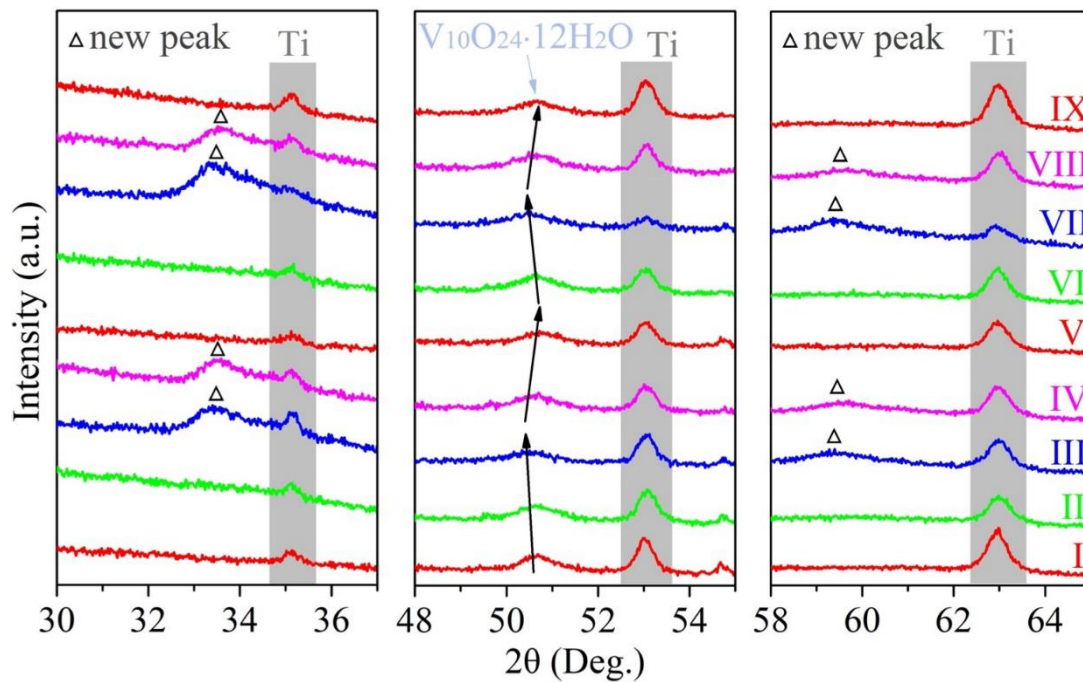

**Fig. S9** The magnified ex situ XRD patterns of RA- $V_2O_5$  at nine different charge/discharge states at 21<sup>th</sup> and 22<sup>th</sup> cycles.

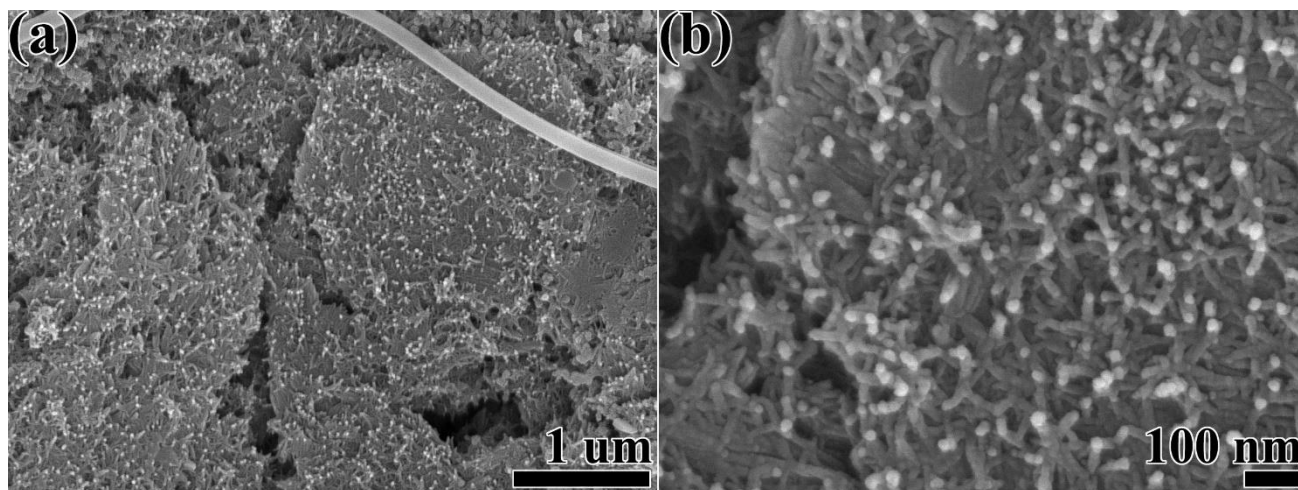

**Fig. S10** SEM images of the RA- $V_2O_5$  electrode surface after 2000 cycles at  $2 \text{ A g}^{-1}$ .



**Table S1** The capacities of RA-V<sub>2</sub>O<sub>5</sub> in comparison with that of state-of-the-art vanadium-based cathode materials for AZIBs.

| Cathode material                                                                     | Capacity                                             | Reference   |
|--------------------------------------------------------------------------------------|------------------------------------------------------|-------------|
| RA-V <sub>2</sub> O <sub>5</sub>                                                     | 449.8 mA h g <sup>-1</sup> at 0.1 A g <sup>-1</sup>  | This report |
|                                                                                      | 314.3 mA h g <sup>-1</sup> at 2 A g <sup>-1</sup>    |             |
|                                                                                      | 186.8 mA h g <sup>-1</sup> at 5 A g <sup>-1</sup>    |             |
| Mg <sub>0.34</sub> V <sub>2</sub> O <sub>5</sub> ·0.84H <sub>2</sub> O               | 353 mA h g <sup>-1</sup> at 0.1 A g <sup>-1</sup>    | 1           |
|                                                                                      | 81 mA h g <sup>-1</sup> at 5 A g <sup>-1</sup>       |             |
| Ag <sub>0.4</sub> V <sub>2</sub> O <sub>5</sub>                                      | 340 mA h g <sup>-1</sup> at 0.1 A g <sup>-1</sup>    | 2           |
|                                                                                      | 185 mA h g <sup>-1</sup> at 2 A g <sup>-1</sup>      |             |
| Porous V <sub>2</sub> O <sub>5</sub> nanofibers                                      | 319 mA h g <sup>-1</sup> at 0.02 A g <sup>-1</sup>   | 3           |
|                                                                                      | 104 mA h g <sup>-1</sup> at 3 A g <sup>-1</sup>      |             |
| V <sub>2</sub> O <sub>5</sub> nanosheets                                             | 224 mA h g <sup>-1</sup> at 0.1 A g <sup>-1</sup>    | 4           |
|                                                                                      | 100 mA h g <sup>-1</sup> at 2 A g <sup>-1</sup>      |             |
| V <sub>2</sub> O <sub>5</sub> nanospheres                                            | 188.7 mA h g <sup>-1</sup> at 0.5 A g <sup>-1</sup>  | 5           |
|                                                                                      | 138.3 mA h g <sup>-1</sup> at 5 A g <sup>-1</sup>    |             |
| V <sub>2</sub> O <sub>5</sub> hollow spheres                                         | 280 mA h g <sup>-1</sup> at 0.2 A g <sup>-1</sup>    | 6           |
|                                                                                      | 147 mA h g <sup>-1</sup> at 5 A g <sup>-1</sup>      |             |
| VO <sub>2</sub>                                                                      | 283 mA h g <sup>-1</sup> at 0.1 A g <sup>-1</sup>    | 7           |
|                                                                                      | 72 mA h g <sup>-1</sup> at 5 A g <sup>-1</sup>       |             |
| VO <sub>2</sub>                                                                      | 274 mA h g <sup>-1</sup> at 0.1 A g <sup>-1</sup>    | 8           |
|                                                                                      | 170 mA h g <sup>-1</sup> at 5 A g <sup>-1</sup>      |             |
| V <sub>10</sub> O <sub>24</sub> ·12H <sub>2</sub> O                                  | 164.5 mA h g <sup>-1</sup> at 0.2 A g <sup>-1</sup>  | 9           |
|                                                                                      | 90.4 mA h g <sup>-1</sup> at 5 A g <sup>-1</sup>     |             |
| VS <sub>2</sub>                                                                      | 190.3 mA h g <sup>-1</sup> at 0.05 A g <sup>-1</sup> | 10          |
|                                                                                      | 115.5 mA h g <sup>-1</sup> at 2 A g <sup>-1</sup>    |             |
| LiV <sub>3</sub> O <sub>8</sub>                                                      | 230 mA h g <sup>-1</sup> at 0.033 A g <sup>-1</sup>  | 11          |
|                                                                                      | 29 mA h g <sup>-1</sup> at 1.666 A g <sup>-1</sup>   |             |
| NaV <sub>3</sub> O <sub>8</sub> ·1.5H <sub>2</sub> O                                 | 375 mA h g <sup>-1</sup> at 0.1 A g <sup>-1</sup>    | 12          |
|                                                                                      | 165 mA h g <sup>-1</sup> at 4 A g <sup>-1</sup>      |             |
| NaV <sub>6</sub> O <sub>15</sub> nanorods                                            | 427 mA h g <sup>-1</sup> at 0.05 A g <sup>-1</sup>   | 13          |
|                                                                                      | 195 mA h g <sup>-1</sup> at 1.6 A g <sup>-1</sup>    |             |
| Zn <sub>2</sub> V <sub>2</sub> O <sub>7</sub>                                        | 203.4 mA h g <sup>-1</sup> at 0.3 A g <sup>-1</sup>  | 14          |
|                                                                                      | 155 mA h g <sup>-1</sup> at 4 A g <sup>-1</sup>      |             |
| Zn <sub>2</sub> (OH)VO <sub>4</sub>                                                  | 204 mA h g <sup>-1</sup> at 0.1 A g <sup>-1</sup>    | 15          |
|                                                                                      | 160 mA h g <sup>-1</sup> at 2 A g <sup>-1</sup>      |             |
| Zn <sub>3</sub> V <sub>2</sub> O <sub>7</sub> (OH) <sub>2</sub> ·2H <sub>2</sub> O   | 213 mA h g <sup>-1</sup> at 0.05 A g <sup>-1</sup>   | 16          |
|                                                                                      | 76 mA h g <sup>-1</sup> at 3 A g <sup>-1</sup>       |             |
| Fe <sub>5</sub> V <sub>15</sub> O <sub>39</sub> (OH) <sub>9</sub> ·9H <sub>2</sub> O | 385 mA h g <sup>-1</sup> at 0.1 A g <sup>-1</sup>    | 17          |
|                                                                                      | 105 mA h g <sup>-1</sup> at 5 A g <sup>-1</sup>      |             |
| VOPO <sub>4</sub>                                                                    | 139 mA h g <sup>-1</sup> at 0.05 A g <sup>-1</sup>   | 18          |
|                                                                                      | 50 mA h g <sup>-1</sup> at 5 A g <sup>-1</sup>       |             |

## References

1. F. W. Ming, H. F. Liang, Y. J. Lei, S. Kandambeth, M. Eddaoudi and H. N. Alshareef, *ACS Energy Lett.*, 2018, **3**, 2602-2609.
2. L. Shan, Y. Yang, W. Zhang, H. Chen, G. Fang, J. Zhou and S. Liang, *Energy Storage Mater.*, 2018, **18**, 10-14.
3. X. Chen, L. Wang, H. Li, F. Cheng and J. Chen, *J. Energy Chem.*, 2019, **38**, 20-25.
4. J. Zhou, L. T. Shan, Z. X. Wu, X. Guo, G. Z. Fang and S. Q. Liang, *Chem. Commun.*, 2018, **54**, 4457-4460.
5. F. Liu, Z. Chen, G. Fang, Z. Wang, Y. Cai, B. Tang, J. Zhou and S. Liang, *Nano-Micro Lett.*, 2019, **11**, 25.
6. H. Qin, L. Chen, L. Wang, X. Chen and Z. Yang, *Electrochim. Acta*, 2019, **306**, 307-316.
7. L. N. Chen, Y. S. Ruan, G. B. Zhang, Q. L. Wei, Y. L. Jiang, T. F. Xiong, P. He, W. Yang, M. Y. Yan, Q. Y. An and L. Q. Mai, *Chem. Mater.*, 2019, **31**, 699-706.
8. T. Y. Wei, Q. Li, G. Z. Yang and C. X. Wang, *J. Mater. Chem. A*, 2018, **6**, 8006-8012.
9. T. Y. Wei, Q. Li, G. Z. Yang and C. X. Wang, *Electrochim. Acta*, 2018, **287**, 60-67.
10. P. He, M. Y. Yan, G. B. Zhang, R. M. Sun, L. N. Chen, Q. Y. An and L. Q. Mai, *Adv. Energy Mater.*, 2017, **7**, 1601920.
11. M. H. Alfaruqi, V. Mathew, J. Song, S. Kim, S. Islam, D. T. Pham, J. Jo, S. Kim, J. P. Baboo, Z. Xiu, K. S. Lee, Y. K. Sun and J. Kim, *Chem. Mater.*, 2017, **29**, 1684-1694.
12. F. Wan, L. L. Zhang, X. Dai, X. Y. Wang, Z. Q. Niu and J. Chen, *Nat. Commun.*, 2018, **9**, 1656.
13. S. Islam, M. H. Alfaruqi, B. Sambandam, D. Y. Putro, S. Kim, J. Jo, S. Kim, V. Mathew and J. Kim, *Chem. Commun.*, 2019, **55**, 3793-3796.
14. B. Sambandam, V. Soundharrajan, S. Kim, M. H. Alfaruqi, J. Jo, S. Kim, V. Mathew, Y. K. Sun and J. Kim, *J. Mater. Chem. A*, 2018, **6**, 3850-3856.
15. D. L. Chao, C. Zhu, M. Song, P. Liang, X. Zhang, N. H. Tiep, H. F. Zhao, J. Wang, R. M. Wang, H. Zhang and H. J. Fan, *Adv. Mater.*, 2018, **30**, 1803181.
16. C. Xia, J. Guo, Y. J. Lei, H. F. Liang, C. Zhao and H. N. Alshareef, *Adv. Mater.*, 2018, **30**, 1705580.
17. Z. Peng, Q. L. Wei, S. S. Tan, P. He, W. Luo, Q. Y. An and L. Q. Mai, *Chem. Commun.*, 2018, **54**, 4041-4044.
18. F. Wan, Y. Zhang, L. Zhang, D. Liu, C. Wang, L. Song, Z. Niu and J. Chen, *Angew. Chem. Int. Edit.*, 2019, **58**, 7062-7067.
